# Supplementary material
Source: PubMed Central journal article supplement (PMC4519363)
Supplement: NIHMS696121-supplement-Data_Supplement.pdf [file NIHMS696121-supplement-Data_Supplement.pdf]

## **SUPPLEMENTAL MATERIAL**

## ACKNOWLEDGEMENTS

**ENROLLING CLINICAL CENTERS:** University of Cincinnati College of Medicine (72 subjects) J. Broderick, T. Tomsick, **University of Pittsburgh Medical Center** (46) L. Wechsler, T. Jovin, **Calgary Health Region/Foothills Medical Centre** (44) A. Demchuk, M. Goyal, **Toronto Western Hospital** (29) F. Silver, K. Murphy, **Hospital Vall d'Hebron** (28) C. Molina, M. Ribo, **Royal Melbourne Hospital** (27) B. Yan, P. Mitchell, **Mayo Clinic Arizona** (26) B. Demaerschalk, B. Chong, **Oregon Health Sciences University, Oregon Stroke Center** (24) W. Clark, S. Barnwell, **Riverside Methodist Hospital** (24) R. Budzik, **Alexian Brothers Hospital Network** (23) T. Malisch, **Froedtert Hospital/ Medical College of Wisconsin** (23) O.Zaidat, **Colorado Neurological Institute/Swedish Medical Center** (21) C. Fanale, D. Frei, **Allegheny General Hospital** (18) A. Tayal, A. Ku, **Dresden University of Technology** (17), U. Bodechtel, R. von Kummer, **Ruan Neurology /Mercy Medical Center**, (16) M Jacoby, W. Young, **Lehigh Valley Hospital** (15) Y. Isayev, D. Shaff, **UCLA Medical Center** (14) S. Starkman, F. Vinuela **University of Louisville** (11) A. Abou-Chebl, **Martin Luther University** (10) K. Wartenberg, K. Stock, **Royal Prince Alfred Hospital** (10) C. Anderson, G. Parker, **Abington Memorial Hospital** (9) Q. Shah, **Vancouver General Hospital** (9) A. Woolfenden, G. Redekop, **Henry Ford Hospital** (8) C. Lewandowski, W. Sanders, **University of Virginia Health System** (8) E. Clarke Haley, A. Evans, **Washington University** (8) P. Panagos, C. Derdeyn, **Hoag Memorial Hospital Presbyterian** (7) D. Brown, M. Brandt-Zawadzki, **Morton Plant Mease Health Care** (7) A. Arora, E. Lopez De Valle, **PENN State M.S. Hershey Medical Center** (7) K. Cockroft, **University of Miami Miller School of Medicine/Jackson Memorial Hospital** (7) D. Yavagal, **Lahey Clinic Medical Center** (6) In Sup Choi, **Mission Hospitals/Mission Neurology Services** (6) A. Schneider, J. Short, **Monash Medical Centre** (6) T. Phan, W. Chong, **University of North Carolina** (5) D. Huang, S. Solander, **University of Texas Medical School at Houston** (5), J. Grotta, P. Chen, **Upstate Medical University** (5) Z. El Zammar, E. Deshaies, **Bichat Stroke Centre and Paris Diderot University** (4) P. Amarenco, M. Mazighi, **Medical University of South Carolina** (4) E. Jauch, A. Turk, **Ottawa Hospital-Civic Campus** (4) G. Stotts, C. Lum, **Park Nicollet Institute** (4) S. Hanson, M. Madison, **Trillium Health Care** (4) D. Selchen, D. Rosso, **Chattanooga Ctr. for Neurological Res** (3) T. Delvin, B. Baxter, **Jewish Hospital Louisville** (3) J. Gebel, R. Paulson, **Nevada Neuroscience Institute Research Foundation** (3) S. Selco, L. Blake, **St. Antonius Hospital** (3) W. Schonewille, JA. Vos, **Stroke Center at Hartford** (3) L. Abbott, G. Spiegel, **University of Montreal Notre Dame Hospital** (3) A. Poppe, J. Raymond, **Barrow Neurology Clinics at St. Joseph's Hospital and Med. Ctr.** (2), J. Frey, F. Albuquerque, **Cleveland Clinic** (2) D. Krieger, T. Masaryk, **Michigan State University Sparrow Hospital** (2), S. Hussain, **Sunnybrook Health Sciences Centre** (2) R. Swartz, P. Howard, **University Hospitals Case Medical Center** (2) R. Tarr. **Rhode Island Hospitals** (1) P. Panagos, R. Haas, **Hospital Universitari Germans Trias i Pujol** (1) A. Davalos, P. Bermejo, **Johns Hopkins University** (1) V. Urrutia, M. Radvany, **Massachusetts General Hospital** (1) L. Schwamm, R. Nogueira, **St. Vincent's Hospital** (1) R. Markus, R. Parkinson, **University Medical Center at Brackenridge & Seton Medical Center** (1) J. Neal Rutledge, **William Beaumont Hospital** (1) C. Kazmierczak.

**NON ENROLLING SITES:** Intercoastal Medical Group/Sarasota Memorial Hospital-M. Concha, N. Razack, University of Rochester Medical Center-C. Benesch, B. Jahromi, St. Louis University-R. Edgell, N. Vora, Reading Hospital and Medical Center-R. Chavali, Methodist Research Institute/Clarian Health Partners-J. Scott, Central DuPage Hospital-H. Shownkeen, QEII Health Sciences Centre, Dalhousie University-S. Phillips, E. Versnick, Hospital of the University of Pennsylvania- S. Kasner, R. Hurst, University of Alberta Stroke Program- A. Shuaib, D. Emery, Sutter Medical Facility of Sacramento-B. Varjavand, R. Atkinson, St. John

Providence Medical Center-R. Fessler, University of Freiburg- W. Niesen, C. Hader, Ernst Moritz Arndt University-A. Khaw, S. Langner, University of Basel- P.Lyrer, C. Stippich

**EXECUTIVE COMMITTEE:** Voting Members - J. Broderick, T. Tomsick, P. Khatri, J. Spilker, J. Carrozzella, Y. Palesch, P. Mauldin, E. Jauch, T. Jovin, A. Demchuk, M. Goyal, M. Hill, K. Ryckborst, B. Yan, C. Molina, R. von Kummer, W. Schonewille P. Amarenco, S. Engelter, S. Janis.

**UNIVERSITY OF CINCINNATI CLINICAL COORDINATING AND ANGIOGRAM IMAGE ANALYSIS CENTER:** J. Broderick, T. Tomsick, P. Khatri, D. Kanter, J. Spilker, J. Carrozzella, J. Frasure, R. Beckmann, D. Liebeskind (UCLA-contracted angio central reader), Neuroscience Trials Australia (Heidelberg, Victoria AU-contracted AU CRO-T. Soulis General Manager) and AU drug distribution Center at The Royal Melbourne Hospital Clinical Trials Pharmacy G. Hong, Clinical Research Services (Kelkheim/Ts, DE-contracted EU CRO-Dr. med. D. Salein) K. MacDonald-Device Regulatory Consultant.

**STATISTICAL AND DATA COORDINATION UNIT AT MEDICAL UNIVERSITY SOUTH CAROLINA:** Y. Palesch, S. Yeatts, R. Martin, L. Foster, R. Leinster, K. Briggs, C. Dillion, P. Mauldin, K. Simpson, A. Simpson.

**CT IMAGING ANALYSIS AND CANADIAN DRUG DISTRIBUTION AND COORDINATING CENTER:** A. Demchuk, M Goyal, M Hill, M. Hudon, J. Kosier, K. Ryckborst, A. Martin.

**INDEPENDENT MEDICAL AND NEUROINTERVENTIONAL MONITORS:** Internal: P. Khatri, D. Kanter, J. Spilker, J. Frasure, J. Carrozzella External: S. Levine and P. Meyers.

**SCIENTIFIC ADVISORY COMMITTEE:** T. Brott, G. DelZoppo, H. Cloft, G. Howard.

**DATA AND SAFETY MONITORING BOARD:** P. Lyden, C. Coffey, M. Di Tullio, C. Jungreis C. Wijman and from NINDS J. Cordell.

**COORPORATE PARTNERS:** Genentech, Inc., Codman Neurovascular (a business unit of Codman & Surtleff, Inc.), EKOS Corporation, Concentric Medical Inc. (a wholly owned subsidiary of Stryker Neurovascular), Penumbra, Inc, ev3 Neurovascular (division of Tyco Healthcare Group d/b/a/ Covidien).

**NINDS ADMINISTRATION AND PROGRAM DIRECTOR:** S. Janis, W. Galpern.
